# Supplementary material for: A Focus Group Study of Self-Management in Patients With Glomerular Disease
Source: PubMed Central journal article supplement — Kidney Int Rep. 2021 Oct 30;7(1):56–67. doi: 10.1016/j.ekir.2021.10.011 (PMC8720796; doi:10.1016/j.ekir.2021.10.011), 2021-10-30
Supplement: mmc1.pdf [file mmc1.pdf]

**Supplementary Item 1.** Participating sites and institutional review boards.

Monash Medical Centre, Monash Health, Melbourne, Victoria, Australia

Princess Alexandra Hospital, Woolloongabba, Brisbane, Australia

Westmead Hospital, Westmead, Sydney, New South Wales, Australia

Los Angeles Biomedical Research Institute at Harbor-UCLA Medical Center, Torrance,  
United States

York Hospital, Clifton, York, United Kingdom

Imperial College London, South Kensington, London, United Kingdom

Sheffield Teaching Hospitals NHS Foundation Trust, Sheffield, United Kingdom

Queen Mary Hospital, The University of Hong Kong, Hong Kong

Tuen Mun Hospital, Tuen Mun, Hong Kong

Princess Margaret Hospital, Kwai Chung, Hong Kong

Pok Oi Hospital, Yuen Long, Northwest New Territories, Hong Kong

## **Supplementary Item 2.** Question guide

1. What are the major features that affect you day-to-day?
2. To what extent do you feel like you have control/ownership over your kidney health  
- why?
3. Is there anything that you do to “manage” your health – why?
4. Do you feel the need to have access to research figures and numbers in making  
decisions about your health?
5. What are your preferences about accessing this information? (i.e. online, healthcare  
provider or some other way)
6. What are the biggest challenges to deal with in managing your health and how do  
you cope?
7. What are your health goals in the short term (up to 3 years) and in the longer term;  
and is there anything you are thinking of/or doing in view of these goals?

**Supplementary Table 1.** Distribution of the identified themes by country, age group, stage of kidney disease and type of glomerular disease.

|                                           | <b>Themes*</b>                                      |                              |                                            |                                                     |
|-------------------------------------------|-----------------------------------------------------|------------------------------|--------------------------------------------|-----------------------------------------------------|
|                                           | <b>Necessity of health-sustaining relationships</b> | <b>Empowered in autonomy</b> | <b>Striving for stability and normalcy</b> | <b>Overwhelmed by compounding treatment burdens</b> |
| Country                                   |                                                     |                              |                                            |                                                     |
| Australia                                 | 100                                                 | 169                          | 175                                        | 129                                                 |
| United States                             | 66                                                  | 56                           | 56                                         | 49                                                  |
| United Kingdom                            | 48                                                  | 51                           | 54                                         | 41                                                  |
| Hong Kong                                 | 11                                                  | 21                           | 13                                         | 9                                                   |
| Age group (years)                         |                                                     |                              |                                            |                                                     |
| 18-39                                     | 69                                                  | 88                           | 89                                         | 74                                                  |
| 40-59                                     | 50                                                  | 81                           | 86                                         | 67                                                  |
| 60-79                                     | 76                                                  | 99                           | 101                                        | 70                                                  |
| Treatment stage of kidney disease         |                                                     |                              |                                            |                                                     |
| Chronic kidney disease                    | 139                                                 | 210                          | 204                                        | 156                                                 |
| Hemodialysis                              | 22                                                  | 23                           | 38                                         | 25                                                  |
| Peritoneal dialysis                       | 13                                                  | 15                           | 15                                         | 4                                                   |
| Kidney transplant                         | 29                                                  | 29                           | 26                                         | 29                                                  |
| Type of glomerular disease                |                                                     |                              |                                            |                                                     |
| Lupus nephritis                           | 36                                                  | 38                           | 57                                         | 44                                                  |
| ANCA-associated vasculitis                | 31                                                  | 30                           | 40                                         | 37                                                  |
| IgA nephropathy                           | 30                                                  | 75                           | 45                                         | 27                                                  |
| Focal segmental glomerulosclerosis        | 29                                                  | 33                           | 35                                         | 22                                                  |
| Membranous nephropathy                    | 6                                                   | 17                           | 15                                         | 11                                                  |
| Minimal change disease                    | 8                                                   | 15                           | 12                                         | 13                                                  |
| Membranoproliferative glomerulonephritis  | 9                                                   | 13                           | 8                                          | 18                                                  |
| C3 glomerulopathy                         | 15                                                  | 12                           | 9                                          | 6                                                   |
| Anti-glomerular basement membrane disease | -                                                   | 2                            | 11                                         | 4                                                   |
| IgG4-related disease                      | 5                                                   | 4                            | 2                                          | 6                                                   |

\*Number of coding instances for themes also varied by different numbers of participants per country, age group, stage of kidney disease and type of glomerular disease.
